# Supplementary material for: High-Throughput Sequencing Reveals New Viroid Species in <i>Opuntia</i> in Mexico
Source: Preprints.org preprint supplement (doi:10.20944/preprints202406.1823.v1), 2024-06-26
Supplement: Supplementary file 1 [file supplementary]

## Sheet: Hoja1
Supplementary Table 1. Detection of viruses and viroids by RT-PCR in different prickly pear cactus samples.
	Virus/Viroid analyzed
Sample ID	OV2	CCV-1	OPVA	Ovd-1	Ovd-2	MOVd
T1	+	-	-	-	+	-
T2	+	+	-	-	-	-
T3	+	+	-	-	-	-
T4	+	+	+	+	+	-
T5	+	-	+	-	-	-
T6	+	-	+	+	+	-
T7	+	-	-	-	-	-
T8	+	-	-	-	+	-
T9	+	-	+	-	+	-
T10	+	-	+	-	-	-
T11	+	-	+	-	+	-
T12	+	-	+	-	+	-
T13	+	+	+	-	+	-
T14	+	-	+	-	+	-
T15	+	-	+	-	-	-
T16	+	-	+	-	-	-
T17	+	-	+	-	+	-
T18	+	-	-	-	-	-
T19	+	-	-	-	-	-
T20	+	-	-	-	+	-
T21	+	-	-	-	-	-
T22	+	+	-	-	-	-
T23	+	+	-	-	-	-
T24	+	-	-	-	-	-
T25	+	-	-	-	-	-
T26	+	+	+	-	+	-
T27	+	-	+	-	-	-
T28	+	-	+	-	-	-
T29	+	-	+	-	-	-
T30	+	-	+	+	-	-
T31	+	-	+	+	-	-
T32	+	-	+	+	-	-
T33	+	+	+	-	-	-
T34	+	-	+	-	-	-
T35	+	-	+	-	-	-
V1	+	+	-	-	-	-
V2	+	+	-	-	-	-
V3	+	+	-	-	-	-
V4	+	+	-	-	-	-
V5	+	+	-	-	-	-
V6	+	+	-	-	-	-
V7	+	+	-	-	-	+
V8	+	+	-	-	-	-
V9	+	+	-	-	-	-
V10	+	+	-	-	-	-
V11	+	+	+	-	-	-
V12	+	+	+	-	-	-
V13	+	+	-	-	-	-
V14	+	+	-	-	-	-
V15	+	+	-	-	-	-
V16	+	+	-	-	-	-
V17	+	+	+	-	-	-
V18	+	+	+	-	-	-
V19	+	+	+	-	-	-
V20	+	+	-	-	-	-
V21	+	+	-	-	-	-
V22	+	+	-	-	-	-
V23	+	+	-	-	-	-
V24	+	+	+	+	-	+
V25	+	+	-	-	-	-
V26	+	+	+	-	-	-
V27	+	+	-	-	-	-
V28	+	+	-	-	-	-
V29	+	+	-	-	-	-
V30	+	+	-	-	-	-
V31	+	+	-	-	-	-
V32	+	+	+	-	-	-
V33	+	+	+	-	-	-
V34	+	+	+	-	-	-
V35	+	+	+	-	-	-
V36	+	+	+	-	-	-
X1	-	-	-	-	-	-
X2	+	-	-	-	-	-
X3	+	-	+	-	-	-
X4	-	-	+	-	-	-
VA1	+	+	-	-	-	-
VA2	-	+	-	-	-	-
VA3	-	+	-	-	-	-
VA4	+	+	-	-	-	-
VA5	+	+	-	-	-	-
VA6	-	+	-	-	-	-
VA7	-	+	-	-	-	-
TA1	+	-	-	-	-	-
TA2	+	-	-	-	-	-
S1	-	+	+	-	-	-
S2	+	+	-	-	-	-
	+=Positive plants in RT-PCR tests
	-=Negative plants in RT-PCR tests
	Symptomatic prickly pear cactus
	Symptomatic nopal vegetable
	Symptomatic xoconostle
	Asymptomatic nopal vegetable
	Asymptomatic prickly pear cactus
	Asymptomaticwild prickly pear cactus
